# Supplementary material for: Metal–organic framework with pore contraction and modification by diethylammonium cations for record SO2/CO2 separation
Source: Royal Society of Chemistry journal article supplement (doi:10.1039/d4cc04382k), 2024-01-01
Supplement: d4cc04382k1.pdf [file d4cc04382k1.pdf]

## Supporting Information

### **Metal-organic framework with pore contraction and modification by diethylammonium cations for record SO<sub>2</sub>/CO<sub>2</sub> separation**

*Mei Yang,<sup>a,#</sup> Wenke Yuan,<sup>a,#</sup> Xiu-Yuan Li,<sup>b,\*</sup> Bo Liu<sup>a</sup> and Huifang Zhou<sup>a,\*</sup>*

<sup>a</sup> College of Chemistry & Pharmacy, Northwest A&F University, Yangling 712100, P. R. China.

<sup>b</sup> School of Materials Science and Chemical Engineering, Xi'an Technological University, Xi'an 710032, China.

To whom correspondence should be addressed.

E-mail: [lixuiyuan@xatu.edu.cn](mailto:lixuiyuan@xatu.edu.cn) (Xiu-Yuan Li)

E-mail: [hfzhou@nwafu.edu.cn](mailto:hfzhou@nwafu.edu.cn) (Huifang Zhou)

## Experimental Section

### Materials and general characterizations

The study utilized analytical-grade reagents, which were commercially available. Powder X-ray diffraction (PXRD) analysis was conducted using a Bruker D8 ADVANCE powder X-ray diffractometer equipped with Cu K $\alpha$  radiation ( $\lambda = 1.5406 \text{ \AA}$ ). Thermogravimetric analysis (TGA) was performed under a nitrogen atmosphere at a constant heating rate of 10 °C per minute, employing a NETZSCH TG 209 F3 instrument. Fourier transform infrared (FT-IR) spectroscopy measurements were performed on a Nicolet Avatar 360 FT-IR instrument. Elemental analysis was performed in an Elementar UNICUBE.

### Synthesis of Zn-DPNA

The synthesis of **Zn-DPNA** was achieved by combining Zn(NO<sub>3</sub>)<sub>2</sub>·6H<sub>2</sub>O (17.9 mg) and 5-(2',5'-dicarboxylphenyl)nicotinic acid (H<sub>3</sub>DPNA, 7.3 mg) in a 10 mL screw-cap glass vial. The mixture was then supplemented with *N,N*-diethylformamide (DEF, 2.0 mL) and a dilute solution of nitric acid (HNO<sub>3</sub>:H<sub>2</sub>O = 1:10, 0.5 mL). Subsequently, the mixture underwent ultrasonication to ensure thorough mixing and homogeneity. Following ultrasonication, the vial was sealed and heated at 120 °C for 48 hours to facilitate the formation of the samples. Upon completion of the heating process, the reaction mixture was allowed to cool to room temperature, the resulting colorless rod-shaped crystals were harvested via filtration. The crystals were washed with DEF to remove any unreacted precursors. The as-synthesized samples then exchanged with dichloromethane for 3 days, followed by activation at 100 °C under vacuum for 8 h. (Et<sub>2</sub>NH<sub>2</sub>)[Zn<sub>5.5</sub>(DPNA)<sub>4</sub>] elemental analysis Calcd. (%): C = 45.88, H = 2.31, N = 4.46; Found (%): C = 44.92, H = 3.06, N = 4.22. FT-IR (4000-400 cm<sup>-1</sup>, see Fig. S10): 3433 (br), 1610 (s), 1369 (s), 1268 (w), 1137 (m), 1049 (m), 917 (w), 832 (m), 780 (m), 707 (m), 580 (s).

### X-ray Crystallography

The X-ray diffraction data were collected using a Bruker APEX-II CCD area detector diffractometer with Cu K $\alpha$  radiation ( $\lambda = 1.54178 \text{ \AA}$ ). The structure was solved by direct method and refined by a full-matrix least-squares method. All non-hydrogen atoms were

refined with anisotropic displacement parameters. Solvent masks are applied after all the atoms are located. The crystallographic data for the MOF are presented in Table S1. This table includes details such as cell dimensions, space group, and structural refinement parameters, providing a comprehensive overview of the crystal structure's precision and quality.

### **Adsorption/desorption experiments**

The synthesized sample of **Zn-DPNA** is placed in dichloromethane and allowed to soak for 48 hours. During this process, fresh dichloromethane is replaced every 12 hours to ensure continuous effective cleaning. The soaked sample is then placed in a vacuum environment and dried at 140°C for 8 hours. N<sub>2</sub> adsorption at 77 K was measured on a micromeritics ASAP 2020 Plus adsorption analyzer. The single-component adsorption isotherms of CO<sub>2</sub> at 273 and 298 K were measured using a micromeritics ASAP 2020 Plus adsorption analyzer. The SO<sub>2</sub> adsorption isotherms at 273 and 298 K were collected using a BSD-PMC corrosive gas adsorption analyzer (Beishide Instrument Technology (Beijing) Co., Ltd.). Cycling adsorption-desorption experiments for SO<sub>2</sub> were conducted on a BSD-PMC corrosive gas adsorption analyzer. Between each cycle, the sample was reactivated at 373 K for 20 minutes.

### **Grand Canonical Monte Carlo (GCMC) simulations**

Grand Canonical Monte Carlo (GCMC) simulations were performed using Materials Studio package. The 2×2×2 supercell was used for the simulations. The partial charges for atoms of the framework were derived from QEq method. All the parameters for atoms of **Zn-DPNA** phases were modeled with the Dreiding forcefield. The LJ potential parameters for SO<sub>2</sub> and CO<sub>2</sub> were taken from the Optimized Potentials for Liquid Simulations–All Atom (OPLS-AA) and TraPPE force field, respectively. A cutoff distance of 7.5 Å was used for LJ interactions, and the Coulombic interactions were calculated by using Ewald summation. For each run, the 5 × 10<sup>6</sup> equilibration steps, 5 × 10<sup>6</sup> production steps were employed.

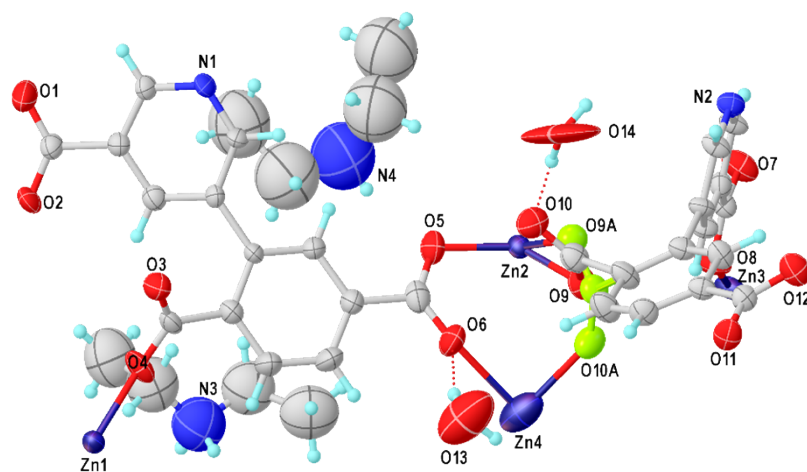

**Fig. S1** Asymmetry unit structure of **Zn-DPNA** with thermal ellipsoids set at 50% probability level. The second disordered component of carboxyl was colored as green.

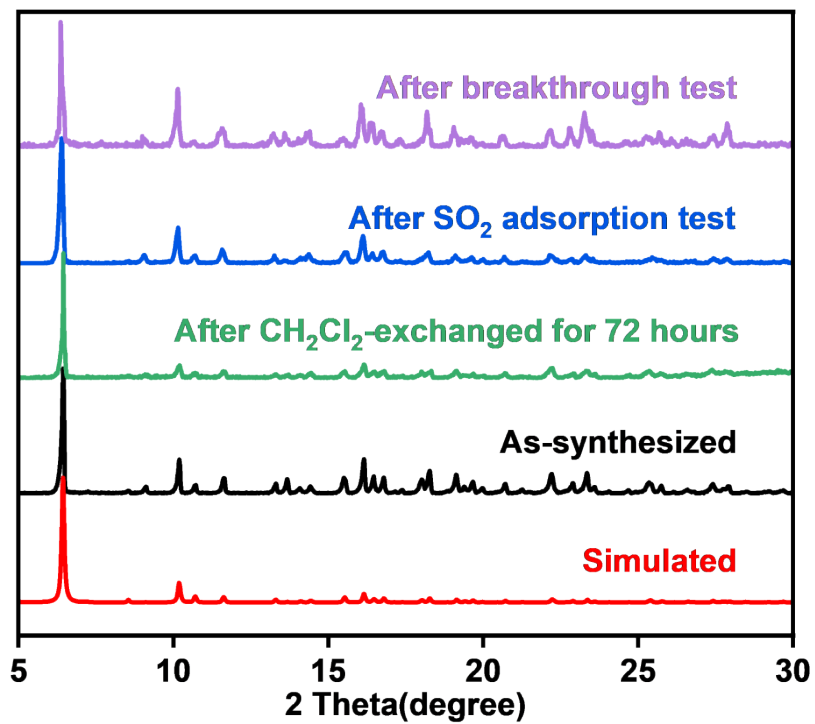

**Fig. S2** PXR D of the single crystal simulated, as-synthesized,  $\text{CH}_2\text{Cl}_2$ -exchanged **Zn-DPNA**, and **Zn-DPNA** after adsorption and breakthrough tests.

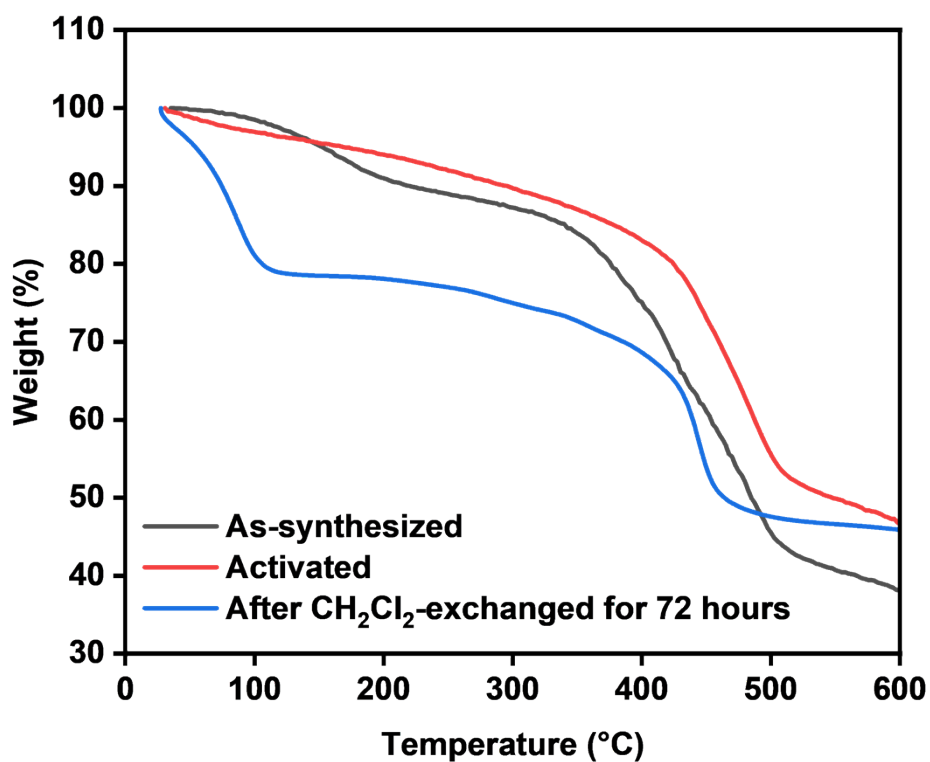

**Fig. S3** TGA curves of the as-synthesized, activated and CH<sub>2</sub>Cl<sub>2</sub>-exchanged **Zn-DPNA** under N<sub>2</sub> atmosphere. The TGA curve of the activated sample shows a slight weight loss before 350 °C indicates possible guest water molecules removal from the structure. This slight weight reduction may be attributed to the re-adsorption of water vapor from the ambient air by the activated sample prior to testing.

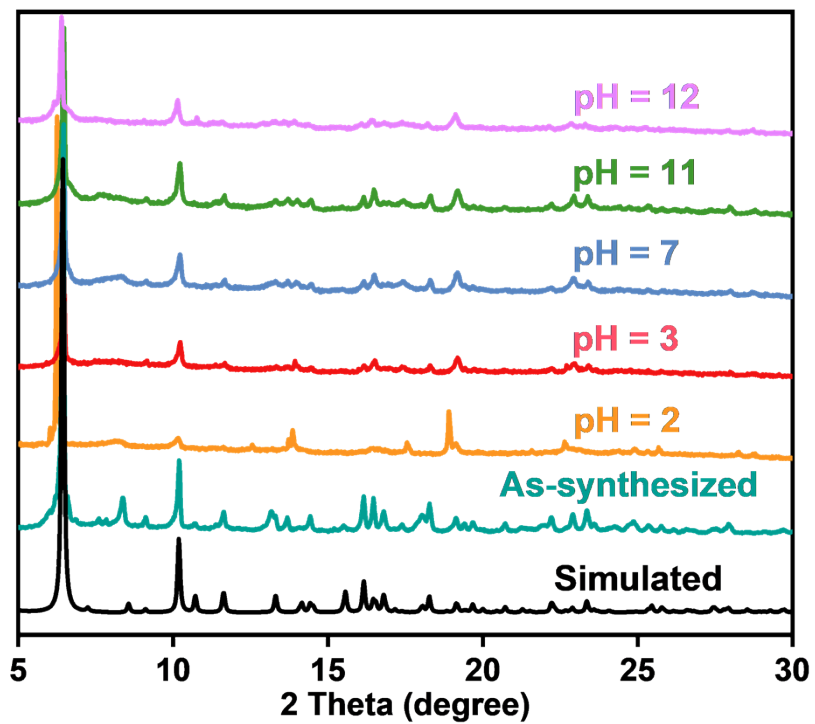

**Fig. S4** PXR D of single crystal simulated, as-synthesized **Zn-DPNA** and **Zn-DPNA** after being soaked in the solution of different pH.

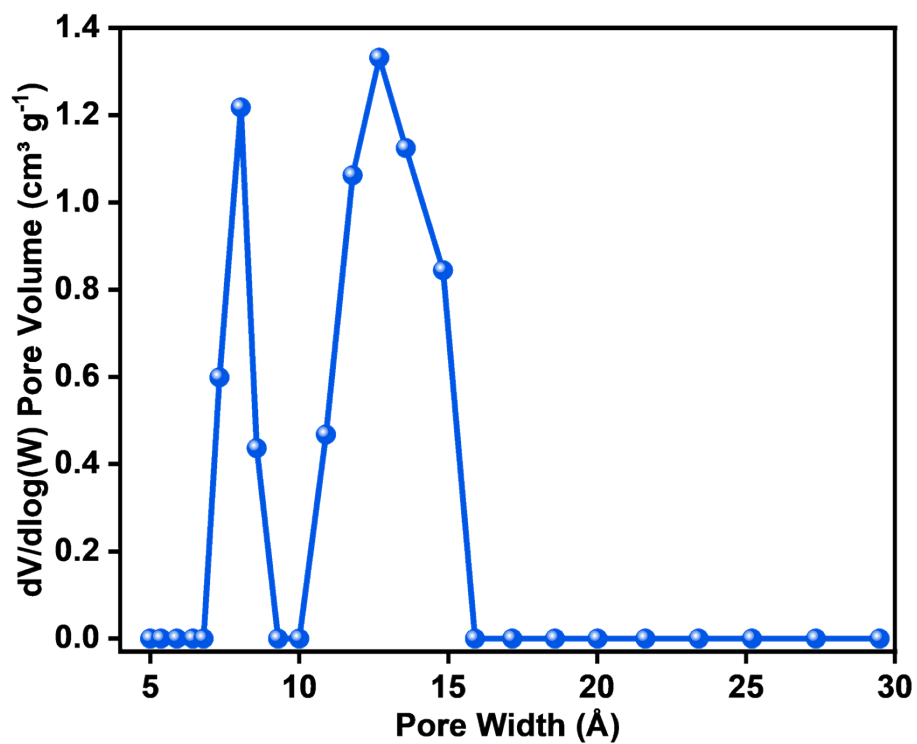

**Fig. S5** Pore size distribution of **Zn-DPNA** calculated by the Non-Local Density Functional Theory (NLDFT).



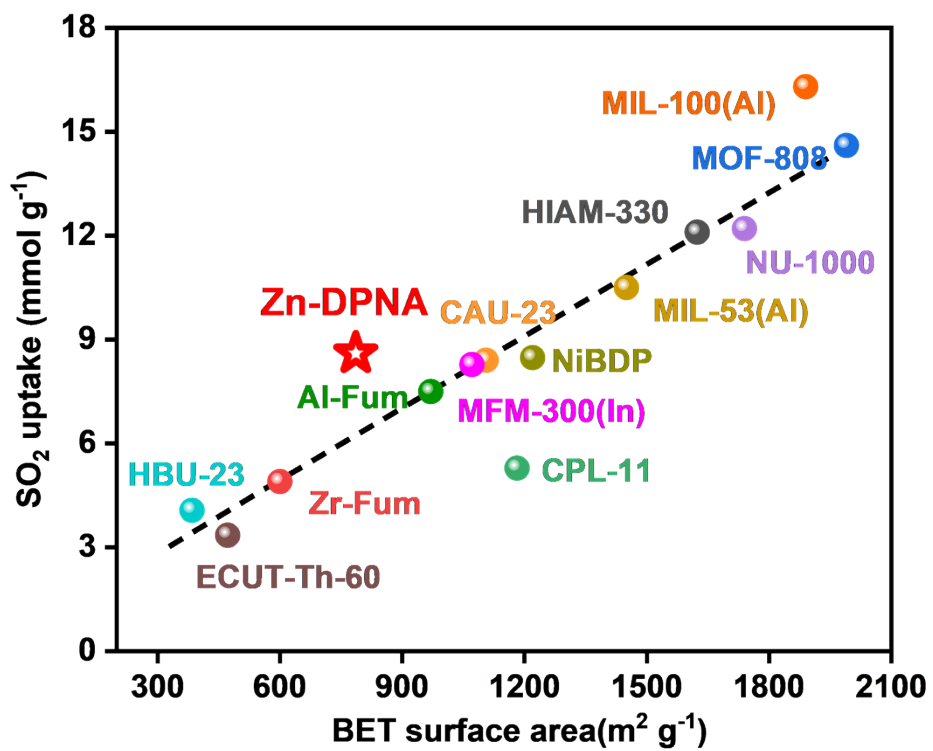

**Fig. S6** Plot of the SO<sub>2</sub> adsorption capacity and BET surface area for **Zn-DPNA** and other top-performing MOFs.

## Calculation of sorption heat for gas uptakes using Virial II model

$$\ln P = \ln N + 1/T \sum_{i=0}^m a_i N^i + \sum_{i=0}^n b_i N^i \quad (\text{eq. S1})$$

$$Q_{st} = -R \sum_{i=0}^m a_i N^i \quad (\text{eq. S2})$$

The eq. S1 was applied to fit the combined gas isotherm data for **Zn-DPNA** at 273 K and 298 K, where  $P$  is the pressure,  $N$  is the adsorbed amount,  $T$  is the temperature,  $a_i$  and  $b_i$  are virial coefficients, and  $m$  and  $n$  are the number of coefficients used to describe the isotherms.  $Q_{st}$  in eq. S2 is the coverage-dependent enthalpy of adsorption and  $R$  is the universal gas constant. The fitting results are given in Table S3.

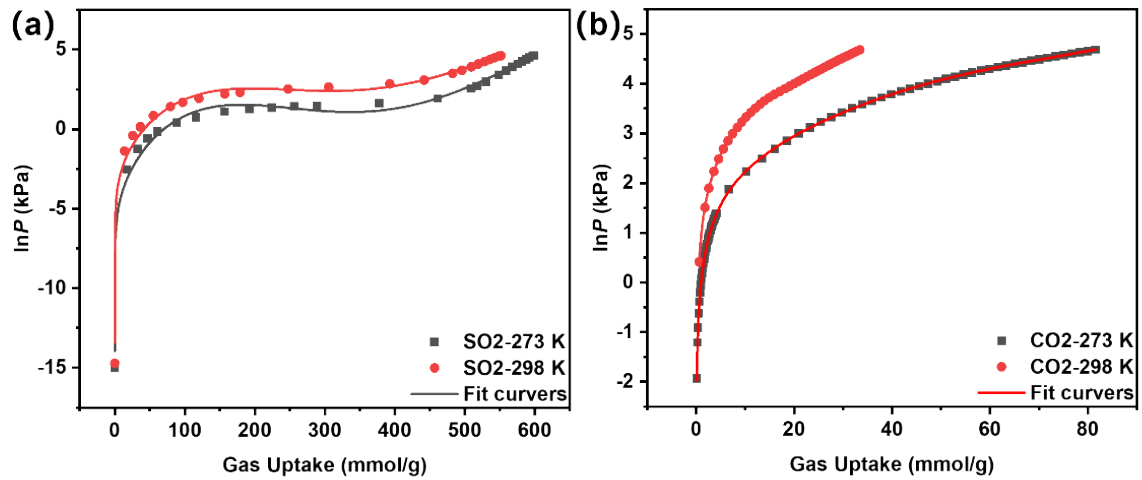

**Fig. S7** The virial fitting of the  $\text{SO}_2$  (a) and  $\text{CO}_2$  (b) adsorption isotherms for **Zn-DPNA** at 273 and 298 K.

## Calculation of IAST selectivity

Single-component gas equilibrium adsorption isotherms were fitted with dual-site Langmuir–Freundlich (DSLFF) model, given by the following equation:

$$N = A_1 \frac{b_1 p^{c_1}}{1 + b_1 p^{c_1}} + A_2 \frac{b_2 p^{c_2}}{1 + b_2 p^{c_2}} \quad (\text{eq. S3})$$

where  $N$  is the amount of adsorbed gas ( $\text{mmol} \cdot \text{g}^{-1}$ ),  $p$  is the bulk gas phase pressure (atm),  $A_1$  and  $A_2$  are the adsorption saturation capacity for site 1 and site 2 ( $\text{mmol} \cdot \text{g}^{-1}$ ),  $b_1$  and  $b_2$  are the affinity coefficients of site (1/kPa),  $c_1$  and  $c_2$  are the Langmuir–Freundlich exponent (dimensionless) for two adsorption sites A and B indicating the presence of weak and strong adsorption sites.

The parameters of  $A_1$ ,  $A_2$ ,  $b_1$ ,  $b_2$ , and  $c_1$ ,  $c_2$  were then used to predict the adsorption selectivity based on IAST, which is finally defined as:

$$S_{\frac{1}{2}} = \left(\frac{x_1}{x_2}\right) \left(\frac{y_2}{y_1}\right) \quad (\text{eq. S4})$$

In eq.S4,  $S$  is the ideal selectivity of component 1 over component 2, where  $x_i$  and  $y_i$  are the mole fractions of component  $i$  ( $i = 1$  and  $2$ ) in the adsorbed and bulk phases, respectively.

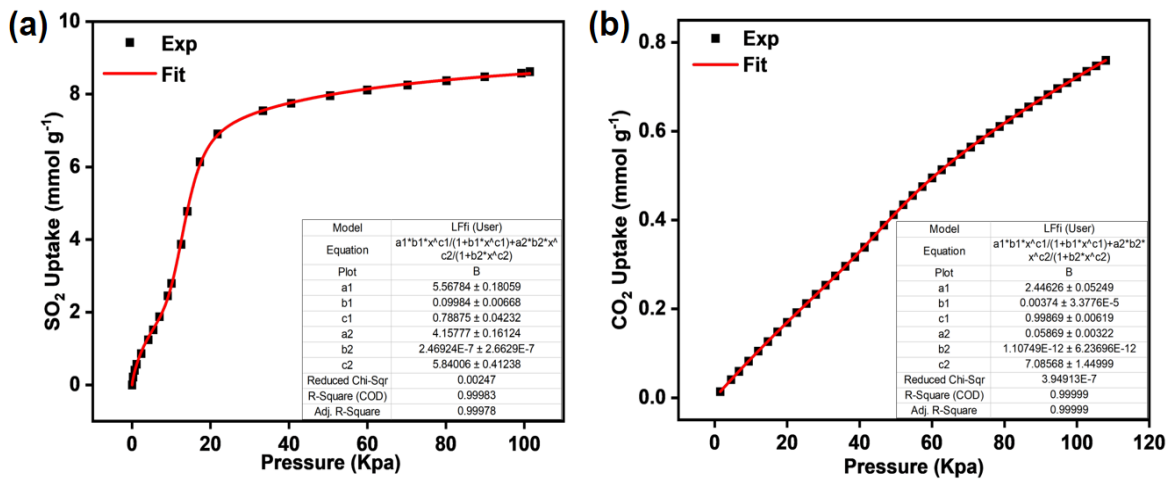

**Fig. S8** DSLF fit of the SO<sub>2</sub> and CO<sub>2</sub> adsorption isotherm of Zn-DPNA at 298 K with dual-site Langmuir-Freundlich model fits.

## Breakthrough experiments

The breakthrough experiment was performed on the BSD-MAB Multicomponent Adsorption Breakthrough Curve Analyzer at 298 K and 1 bar. A stainless-steel column with a length of 70 mm and an inner diameter of 6 mm was used for sample packing. Activated crystalline sample (1~1.2 g) was packed into the column. The column is placed in a circulating jacket connected to the thermostatic bath to control the temperature. Pressure control valve and mass flow controller are used to control the flow and pressure of the gas mixture. Outlet effluent from the column was continuously monitored using gas analytical mass spectrometer. The column packed with sample was firstly activated with N<sub>2</sub> flow of 10 mL min<sup>-1</sup> for 8 h at 433 K. Between two breakthrough experiments, the adsorbent was regenerated by N<sub>2</sub> flow of 10 mL min<sup>-1</sup> for 20 min at 373 K to guarantee complete removal of the adsorbed gases.

On the basis of the mass balance, the gas adsorption capacities can be determined as follows:

$$Q_i = \frac{C_i V}{22.4 \times m} \times \int_0^t \left(1 - \frac{F}{F_0}\right) dt$$

Where  $Q_i$  is the equilibrium adsorption capacity of gas  $i$  (mmol g<sup>-1</sup>),  $C_i$  is the feed gas concentration,  $V$  is the volumetric feed flow rate (mL min<sup>-1</sup>),  $t$  is the adsorption time (min),  $F_0$  and  $F$  are the inlet and outlet gas molar flow rates, respectively, and  $m$  is the mass of the adsorbent (g).

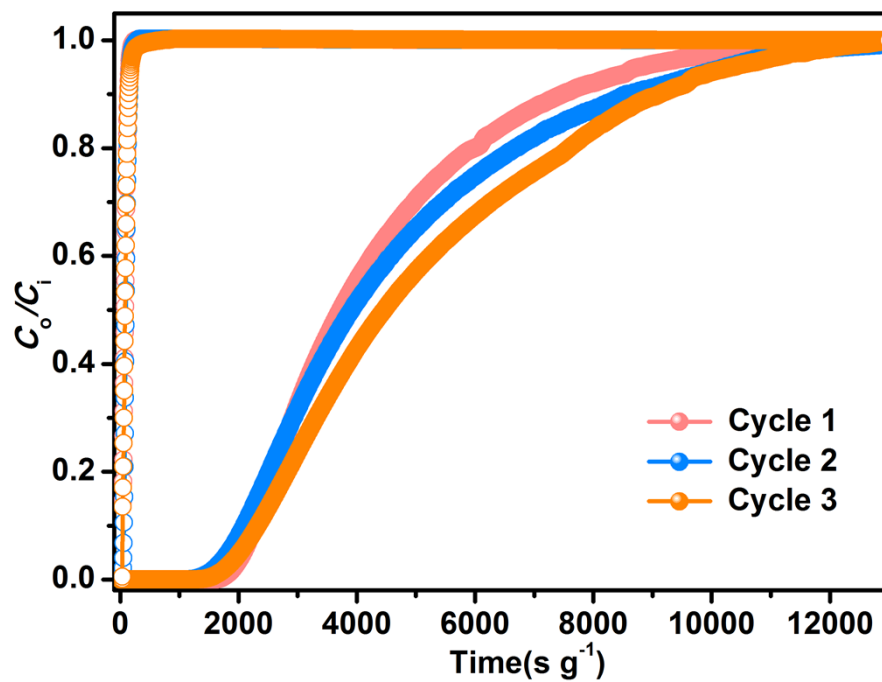

**Fig. S9** Three cycling breakthrough experiments for  $\text{SO}_2/\text{CO}_2$  mixture (2500 ppm  $\text{SO}_2$ , 15%  $\text{CO}_2$  in He) with a total flow rate of  $20\ \text{mL}\ \text{min}^{-1}$  at 298 K.

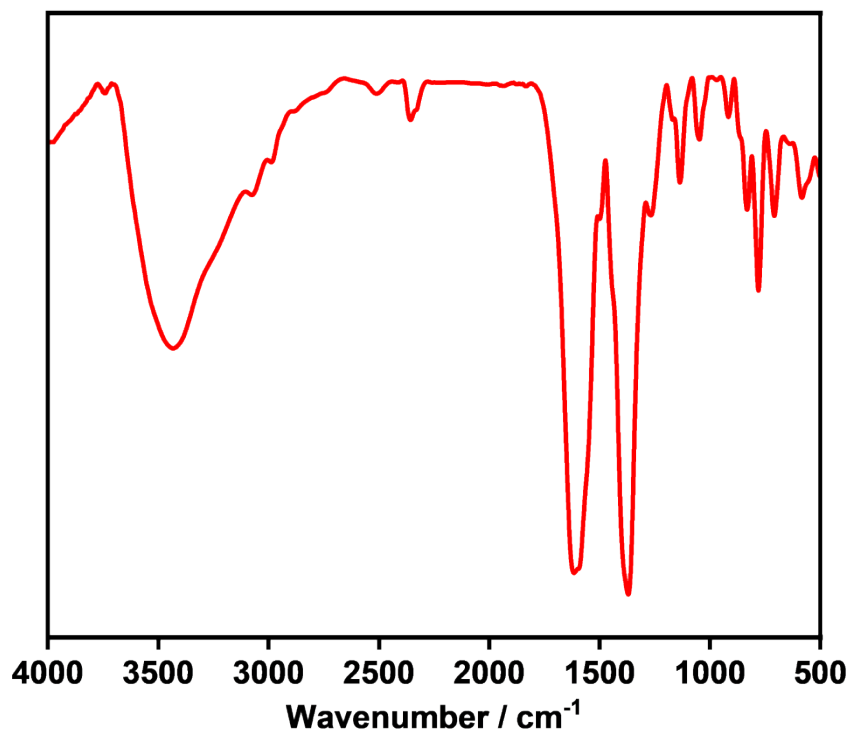

**Fig. S10** Fourier-transform infrared (FT-IR) spectra of Zn-DPNA.

**Table S1.** The crystallography data of **Zn-DPNA**.

| Identification code                           | <b>Zn-DPNA.</b>                                                  |
|-----------------------------------------------|------------------------------------------------------------------|
| Empirical formula                             | $C_{60}H_{38}N_5O_{25}Zn_{5.5}$                                  |
| Formula weight                                | 1588.49                                                          |
| Temperature/K                                 | 220.00(10)                                                       |
| Crystal system                                | tetragonal                                                       |
| Space group                                   | $I-4_2d$                                                         |
| $a/\text{\AA}$                                | 38.8022(8)                                                       |
| $b/\text{\AA}$                                | 38.8022(8)                                                       |
| $c/\text{\AA}$                                | 12.8725(4)                                                       |
| $\alpha/^\circ$                               | 90                                                               |
| $\beta/^\circ$                                | 90                                                               |
| $\gamma/^\circ$                               | 90                                                               |
| Volume/ $\text{\AA}^3$                        | 19381.0(10)                                                      |
| $Z$                                           | 8                                                                |
| $\rho_{\text{calc}}/\text{g/cm}^3$            | 1.089                                                            |
| $\mu/\text{mm}^{-1}$                          | 2.001                                                            |
| $F(000)$                                      | 6384                                                             |
| Crystal size/ $\text{mm}^3$                   | $0.28 \times 0.13 \times 0.12$                                   |
| Radiation                                     | $\text{CuK}\alpha$ ( $\lambda = 1.54178$ )                       |
| $2\theta$ range for data collection/ $^\circ$ | 6.442 to 149.484                                                 |
| Reflections collected                         | 79762                                                            |
| Independent reflections                       | 9688 [ $R_{\text{int}} = 0.1074$ , $R_{\text{sigma}} = 0.0542$ ] |
| Data/restraints/parameters                    | 9688/200/537                                                     |
| Goodness-of-fit on $F^2$                      | 1.021                                                            |
| Final R indexes [ $I \geq 2\sigma(I)$ ]       | $R_1 = 0.0517$ , $wR_2 = 0.1385$                                 |
| Final R indexes [all data]                    | $R_1 = 0.0641$ , $wR_2 = 0.1482$                                 |
| Flack parameter                               | 0.46(4)                                                          |

**Table S2.** Comparison of the SO<sub>2</sub> uptake, BET surface area and selectivity of the SO<sub>2</sub>/CO<sub>2</sub> (50/50 and 10/90, v/v) breakthrough for some reported MOFs.

| Material                     | SO <sub>2</sub> uptake (mmol g <sup>-1</sup> ) | BET surface area (m <sup>2</sup> g <sup>-1</sup> ) | Selectivity of SO <sub>2</sub> /CO <sub>2</sub> (50/50, v/v) | Selectivity of SO <sub>2</sub> /CO <sub>2</sub> (10/90, v/v) | Reference |
|------------------------------|------------------------------------------------|----------------------------------------------------|--------------------------------------------------------------|--------------------------------------------------------------|-----------|
| <b>Zn-DPNA</b>               | 8.6                                            | 786                                                | 1182                                                         | 82                                                           | This work |
| Zr-Fum                       | 4.9                                            | 600                                                | 41                                                           | 46                                                           | 1         |
| MOF-808                      | 14.6                                           | 1990                                               | 370                                                          | 66                                                           |           |
| DUT-67(Zr)                   | 9                                              | 1260                                               | 37                                                           | 22                                                           |           |
| NU-1000                      | 12.2                                           | 1740                                               | 22                                                           | 17                                                           |           |
| MIL-53(Al)                   | 10.5                                           | 1450                                               | 43                                                           | 22                                                           |           |
| NH <sub>2</sub> -MIL-53(Al)  | 8                                              | 620                                                | 56                                                           | 42                                                           |           |
| Al-Fum                       | 7.5                                            | 970                                                | 36                                                           | 35                                                           |           |
| MIL-53(tdc)(Al)              | 6.9                                            | 1000                                               | 83                                                           | 48                                                           |           |
| MIL-96(Al)                   | 6.5                                            | 530                                                | 8                                                            | 7                                                            |           |
| MIL-100(Al)                  | 16.3                                           | 1890                                               | 38                                                           | 18                                                           |           |
| NH <sub>2</sub> -MIL-101(Al) | 17.3                                           | 1770                                               | 16                                                           | 20                                                           |           |
| CAU-23                       | 8.4                                            | 1106                                               | 48                                                           | 34                                                           |           |
| HIAM-330                     | 12.1                                           | 1624                                               | 60                                                           | 44                                                           | 3         |
| MFM-300(In)                  | 8.28                                           | 1071                                               | 47                                                           | -                                                            | 4         |
| HBU-20                       | 6.69                                           | 1551.1                                             | -                                                            | 44.3                                                         | 5         |
| CPL-11                       | 5.29                                           | 1182                                               | -                                                            | 132                                                          | 6         |
| Zr-TPA-FA                    | 22.7                                           | 2150                                               | -                                                            | 20.6                                                         | 7         |
| Zr-TPA-HAc                   | 19.6                                           | 1740                                               | -                                                            | -                                                            |           |
| HBU-23                       | 4.07                                           | 384.2                                              | -                                                            | 58.9                                                         | 8         |
| DMOF-TM                      | 9.68(293K)                                     | -                                                  | 253                                                          | 169                                                          | 9         |
| ECUT-Th-60                   | 3.35                                           | 472                                                | -                                                            | -                                                            | 10        |
| NiBDP                        | 8.48                                           | 1220                                               | -                                                            | -                                                            | 11        |



**Table S3.** Fitting results of SO<sub>2</sub> and CO<sub>2</sub> adsorption isotherms of **Zn-DPNA**.

| Parameter        | SO <sub>2</sub> | CO <sub>2</sub> |
|------------------|-----------------|-----------------|
| b <sub>0</sub>   | 12.62727        | 10.68538        |
| b <sub>1</sub>   | -0.06823        | 0.38343         |
| b <sub>2</sub>   | 3.14937E-4      | -0.02192        |
| b <sub>3</sub>   | -3.65693E-7     | 3.91825E-4      |
| a <sub>0</sub>   | -5329.34531     | -2915.48342     |
| a <sub>1</sub>   | 34.21113        | -108.9498       |
| a <sub>2</sub>   | -0.17251        | 6.22469         |
| a <sub>3</sub>   | 2.70066E-4      | -0.11066        |
| a <sub>4</sub>   | -1.04811E-7     | 1.87879E-5      |
| Chi <sup>2</sup> | 0.14819         | 1.1852E-4       |
| R <sup>2</sup>   | 0.99183         | 0.99996         |

## Reference

- (1) P. Brandt, S.-H. Xing, J. Liang, G. Kurt, A. Nuhnen, O. Weingart and C. Janiak, *ACS Appl. Mater. Interfaces*, 2021, **13**, 29137-29149.
- (2) C. Jansen, N. Tannert, D. Lenzen, M. Bengsch, S. Millan, A. Goldman, D. N. Jordan, L. Sonderrmann, N. Stock and C. Janiak, *Z. Anorg. Allg. Chem.*, 2022, **648**, e202200170.
- (3) L. Yu, M. He, J. Yao, Q. Xia, S. Yang, J. Li and H. Wang, *Chem. Sci.*, 2024, **15**, 8530-8535.
- (4) M. Savage, Y. Cheng, T. L. Easun, J. E. Eyley, S. P. Argent, M. R. Warren, W. Lewis, C. Murray, C. C. Tang, M. D. Frogley, G. Cinque, J. Sun, S. Rudić, R. T. Murden, M. J. Benham, A. N. Fitch, A. J. Blake, A. J. Ramirez-Cuesta, S. Yang and M. Schröder, *Adv. Mater.*, 2016, **28**, 8705-8711.
- (5) Y.-B. Ren, H.-Y. Xu, S.-Q. Gang, Y.-J. Gao, X. Jing and J.-L. Du, *Chem. Eng. J.*, 2022, **431**, 134057.
- (6) L.-Z. Yang, W. Xie, L. Yan, Q. Fu, X. Yuan, Q. Zheng and X. Zhao, *Sep. Purif. Technol.*, 2024, **346**, 127513.
- (7) W. Gong, Y. Xie, A. Yamano, S. Ito, X. Tang, E. W. Reinheimer, C. D. Malliakas, J. Dong, Y. Cui and O. K. Farha, *J. Am. Chem. Soc.*, 2023, **145**, 26890-26899.
- (8) S.-Q. Gang, Z.-Y. Liu, Y.-N. Bian, R. Wang and J.-L. Du, *Sep. Purif. Technol.*, 2024, **335**, 126153.
- (9) S. Xing, J. Liang, P. Brandt, F. Schäfer, A. Nuhnen, T. Heinen, I. Boldog, J. Möllmer, M. Lange, O. Weingart and C. Janiak, *Angew. Chem. Int. Ed.*, 2021, **60**, 17998-18005.
- (10) W. Zhang, W. Jia, J. Qin, L. Chen, Y. Ran, R. Krishna, L. Wang and F. Luo, *Inorg. Chem.*, 2022, **61**, 11879-11885.
- (11) J. L. Obeso, K. Gopalsamy, M. Wahiduzzaman, E. Martínez-Ahumada, D. Fan, H. A. Lara-García, F. J. Carmona, G. Maurin, I. A. Ibarra and J. A. R. Navarro, *J. Mater. Chem. A*, 2024, **12**, 10157-10165.
